# Supplementary material for: Genome-Wide Investigation of Multifocal and Unifocal Prostate Cancer—Are They Genetically Different?
Source: Int J Mol Sci. 2013 Jun 3;14(6):11816–29. doi: 10.3390/ijms140611816 (PMC3709757; doi:10.3390/ijms140611816)
Supplement: Supplementary file 1 [file ijms-14-11816-s001.pdf]

## Supplementary Information

**Table S1.** Concordance between tumors obtained from the same prostate. With the Affymetrix Genotyping console, samples obtained from left and right parts of multifocal and unifocal prostate cancers were analyzed for concordance by utilizing called SNPs (single nucleotide polymorphisms). Percent of concordance above 95% indicates that tumor pairs are concordant and are from the same patient.

| Focal groups                | Tumor 1 | Tumor 2 | # SNPs Called | # Concordant SNPs | Concordance(%) |
|-----------------------------|---------|---------|---------------|-------------------|----------------|
| Multifocal prostate cancers | MS50L   | MS50R   | 889367        | 887885            | 99.83          |
|                             | MS151L  | MS151R  | 880129        | 877810            | 99.74          |
|                             | MS183L  | MS183R  | 878329        | 871493            | 99.22          |
|                             | MS210L  | MS210R  | 873087        | 861764            | 98.7           |
|                             | MS235L  | MS235R  | 870383        | 857435            | 98.51          |
|                             | MS343L  | MS343R  | 868215        | 858846            | 98.92          |
|                             | MS368L  | MS368R  | 891865        | 889358            | 99.72          |
|                             | MS407L  | MS407R  | 850248        | 835899            | 98.31          |
|                             | MS586L  | MS586R  | 883709        | 880514            | 99.64          |
|                             | MS840L  | MS840R  | 875854        | 866243            | 98.9           |
|                             | MS898L  | MS898R  | 875292        | 871653            | 99.58          |
|                             | MS946L  | MS946R  | 873157        | 866811            | 99.27          |
|                             | MS971L  | MS971R  | 869438        | 863180            | 99.28          |
|                             | RD819L  | RD819R  | 890003        | 888132            | 99.79          |
| Unifocal prostate cancers   | MS38L   | MS38R   | 880539        | 875184            | 99.39          |
|                             | MS78L   | MS78R   | 870073        | 862441            | 99.12          |
|                             | MS99L   | MS99R   | 863543        | 850650            | 98.51          |
|                             | MS470L  | MS470R  | 888624        | 884144            | 99.5           |
|                             | MS1096L | MS1096R | 867767        | 861224            | 99.25          |

**Table S2.** Tumor-specific copy number gains and losses. Cytoband regions with copy number alterations and annotated genes. CNV, copy number variation.

| Cytoband region   | CNV event | Number of tumors (n = 41) | Genes annotated to tumor-specific altered cytoband region                                                                                                                                                  |
|-------------------|-----------|---------------------------|------------------------------------------------------------------------------------------------------------------------------------------------------------------------------------------------------------|
| 1p36.13           | gain      | 17                        | <i>NBPF1</i>                                                                                                                                                                                               |
| 1q21.2            | gain      | 8                         | <i>NBPF14, NBPF15, NBPF16, PPIAL4A, PPIAL4B, PPIAL4C, PPIAL4D, PPIAL4E, PPIAL4F</i>                                                                                                                        |
| 7q35              | gain      | 8                         | <i>ARHGEF35, ARHGEF5, CTAGE4, FAM115A, FAM115C, NOBOX, OR2A1, OR2A12, OR2A14, OR2A2, OR2A25, OR2A42, OR2A5, OR2A7, OR2F1, OR2F2, OR6B1, TPK1</i>                                                           |
| 15q11.2           | gain      | 5                         | <i>HBII-52-27, HBII-52-28</i>                                                                                                                                                                              |
| 8p21.2            | loss      | 22                        | <i>ADAM28, ADAM7, ADAMDEC1, ADRA1A, BNIP3L, CDCA2, DOCK5, DPYSL2, EBF2, GNRH1, KCTD9, NEFL, NEFM, NKX2-6, NKX3-1, PNMA2, PPP2R2A, STC1</i>                                                                 |
| 8p21.3            | loss      | 20                        | <i>ATP6V1B2, BMP1, CSGALNACT1, DOK2, EPB49, FAM160B2, FGF17, GFRA2, HR, INTS10, LGI3, LPL, LZTS1, MIR320A, NPM2, NUDT18, PHYHIP, PIWIL2, POLR3D, PPP3CC, REEP4, SFTPC, SH2D4A, SLC18A1, SLC39A14, XPO7</i> |
| 8p21.2 - 8p21.1   | loss      | 19                        | <i>CHRNA2, CLU, EPHX2, MIR3622A, MIR3622B, PTK2B, SCARA3, STMN4, TRIM35</i>                                                                                                                                |
| 8p21.1            | loss      | 19                        | <i>C8orf80, CCDC25, ELP3, ESCO2, MIR4287, PBK, PNOC, SCARA5, ZNF395</i>                                                                                                                                    |
| 8p22              | loss      | 18                        | <i>ASAH1, CNOT7, EFHA2, FGF20, FGL1, MIR383, MSRI, MTMR7, MTUS1, NAT1, NAT2, PCMI, PDGFRL, PSD3, SGCZ, SLC7A2, TUSC3, VPS37A, ZDHHC2</i>                                                                   |
| 8p21.1 - 8p12     | loss      | 17                        | <i>DCTN6, DUSP4, EXTL3, FBXO16, FZD3, HMBOX1, INTS9, KIF13B, LEPROTL1, MBOAT4, MIR3148, MIR4288, TMEM66</i>                                                                                                |
| 8p21.3 - 8p21.2   | loss      | 17                        | <i>BIN3, C8orf58, CHMP7, EGR3, ENTPD4, KIAA1967, LOXL2, PDLIM2, PEBP4, R3HCC1, RHOBTB2, SLC25A37, SORBS3, TNFRSF10A, TNFRSF10B, TNFRSF10C, TNFRSF10D</i>                                                   |
| 8p23.3            | loss      | 17                        | <i>ARHGEF10, C8orf42, CLN8, DLGAP2, ERICH1, FBXO25, KBTBD11, MIR596, MYOM2, OR4F21, ZNF596</i>                                                                                                             |
| 8p11.21           | loss      | 16                        | <i>AGPAT6, ANK1, AP3M2, C8orf40, CHRNA6, CHRNB3, DKK4, GINS4, GOLGA7, IKBKB, MIR486, MYST3, NKX6-3, PLAT, POLB, SFRP1, SLC20A2, VDAC3, ZMAT4</i>                                                           |
| 8p11.22 - 8p11.21 | loss      | 16                        | <i>ADAM2, C8orf4, IDO1, IDO2</i>                                                                                                                                                                           |
| 8p12              | loss      | 15                        | <i>C8orf41, DUSP26, FUT10, GSR, GTF2E2, MAK16, NRG1, PPP2CB, PURG, RBPMS, RNF122, TEX15, UBXN8, WRN</i>                                                                                                    |
| 8p23.1 - 8p22     | loss      | 15                        | <i>C8orf48, DLC1, KIAA1456, LONRF1, MIR3926-1, MIR3926-2</i>                                                                                                                                               |
| 8p11.23 - 8p11.22 | loss      | 14                        | <i>ADAM32, ADAM9, ASH2L, BAG4, C8orf86, DDHD2, EIF4EBP1, FGFR1, HTRA4, LETM2, LSM1, PLEKHA2, PPAPDC1B, STAR, TACCL1, TM2D2, WHSC1L1</i>                                                                    |

Table S2. Cont.

| Cytoband region   | CNV event | Number of tumors (n = 41) | Genes annotated to tumor-specific altered cytoband region                                                                                                                                                                                                  |
|-------------------|-----------|---------------------------|------------------------------------------------------------------------------------------------------------------------------------------------------------------------------------------------------------------------------------------------------------|
| 8p12 - 8p11.23    | loss      | 13                        | <i>KCNU1</i>                                                                                                                                                                                                                                               |
| 8p23.2            | loss      | 13                        | <i>CSMD1</i>                                                                                                                                                                                                                                               |
| 21q22.2 - 21q22.3 | loss      | 13                        | <i>BACE2, DSCAM, FAM3B, MIR3197, MX1, MX2, PCP4, PLAC4</i>                                                                                                                                                                                                 |
| 21q22.3           | loss      | 13                        | <i>TMPRSS2</i>                                                                                                                                                                                                                                             |
| 8p23.2 - 8p23.1   | loss      | 12                        | <i>AGPAT5, ANGPT2, MCPH1</i>                                                                                                                                                                                                                               |
| 8p11.23           | loss      | 12                        | <i>ADRB3, BRF2, ERLIN2, GOT1L1, GPR124, PROSC, RAB11FIP1, ZNF703</i>                                                                                                                                                                                       |
| 13q14.13          | loss      | 12                        | <i>C13orf18, CPB2, LCPI1, ZC3H13</i>                                                                                                                                                                                                                       |
| 13q21.33          | loss      | 12                        | <i>DACH1, KLHL1</i>                                                                                                                                                                                                                                        |
| 13q22.1           | loss      | 12                        | <i>KLF12, KLF5, PIBF1</i>                                                                                                                                                                                                                                  |
| 16q24.1 - 16q24.2 | loss      | 12                        | <i>BANP, CA5A, COX4I1, COX4NB, FBXO31, FOXC2, FOXF1, FOXL1, IRF8, JPH3, KLHDC4, MAP1LC3B, MTHFSD, SLC7A5, ZCCHC14</i>                                                                                                                                      |
| 16q24.2 - 16q24.3 | loss      | 12                        | <i>CTU2, CYBA, FAM38A, IL17C, MVD, RNF166, SNAI3, ZC3H18, ZFPM1, ZNF469</i>                                                                                                                                                                                |
| 10q23.31          | loss      | 11                        | <i>ACTA2, ANKRD22, CH25H, FAS, IFIT1, IFIT1B, IFIT2, IFIT3, IFIT5, KIF20B, KLLN, LIPA, LIPF, LIPJ, LIPK, LIPM, LIPN, MIR107, PANK1, PTEN, RNLS, SLC16A12, STAMBPL1</i>                                                                                     |
| 16q23.2           | loss      | 11                        | <i>CDYL2, DYNLRB2</i>                                                                                                                                                                                                                                      |
| 16q23.3 - 16q24.1 | loss      | 11                        | <i>ADAD2, ATP2C2, C16orf74, COTL1, CRISPLD2, FAM92B, GINS2, HSDL1, KCNG4, KIAA0182, KIAA0513, KIAA1609, KLHL36, LRRC50, MBTPS1, MIR1910, TAF1C, USP10, WFDC1, ZDHHC7</i>                                                                                   |
| 16q24.3           | loss      | 11                        | <i>ACSF3, ANKRD11, APRT, C16orf3, C16orf55, C16orf7, CBFA2T3, CDH15, CDK10, CDT1, CENPBD1, CHMP1A, CPNE7, DBNDD1, DEF8, DPEP1, FANCA, GALNS, GAS8, MC1R, PABPN1L, PRDM7, RPL13, SNORD68, SPATA2L, SPG7, SPIRE2, TCF25, TRAPPC2L, TUBB3, ZNF276, ZNF778</i> |

Table S2. Cont.

| Cytoband region     | CNV event | Number of tumors (n = 41) | Genes annotated to tumor-specific altered cytoband region                                                                                                                                                                                                                                                                                                                                                                                                                                                                                                                                                                                                                                                                                                                                                                                                                                        |
|---------------------|-----------|---------------------------|--------------------------------------------------------------------------------------------------------------------------------------------------------------------------------------------------------------------------------------------------------------------------------------------------------------------------------------------------------------------------------------------------------------------------------------------------------------------------------------------------------------------------------------------------------------------------------------------------------------------------------------------------------------------------------------------------------------------------------------------------------------------------------------------------------------------------------------------------------------------------------------------------|
| 17p13.1             | loss      | 10                        | ACADVL, ACAP1, ALOX12, ALOX12B, ALOX15B, ALOXE3, AMACIL3, ARHGEF15, ASGR1, ASGR2, ATP1B2, AURKB, BCL6B, C17orf100, C17orf49, C17orf59, C17orf61, C17orf74, C17orf81, CCDC42, CD68, CHD3, CHRN1, CLDN7, CLEC10A, CNTROB, CTC1, CTDNEP1, CYB5D1, DHRS7C, DLG4, DNAH2, DVL2, EFNB3, EIF4A1, EIF5A, FBXO39, FGF11, FXR2, GABARAP, GAS7, GLP2R, GPS2, GUCY2D, HES7, KCNAB3, KCTD11, KDM6B, KRBA2, LSMD1, MED31, MFSD6L, MIR195, MIR324, MIR3676, MIR4314, MIR497, MPDU1, MYH10, NDEL1, NEURL4, NLGN2, NTN1, ODF4, PER1, PFAS, PHF23, PIK3R5, PIK3R6, PLSCR3, POLR2A, RANGRF, RCVRN, RNASEK, RNF222, RPL26, SAT2, SCARNA21, SENP3, SHBG, SLC13A5, SLC16A11, SLC16A13, SLC25A35, SLC2A4, SNORA48, SNORA67, SNORD10, SOX15, SPDYE4, SPEM1, STX8, TEK1, TMEM102, TMEM107, TMEM88, TMEM95, TNFSF12, TNFSF12-TNFSF13, TNFSF13, TNK1, TP53, TRAPPC1, TXNDC17, USP43, VAMP2, WDR16, WRAP53, XAF1, YBX2, ZBTB4 |
| 10q23.2 - 10q23.31  | loss      | 10                        | ATAD1, PAPSS2                                                                                                                                                                                                                                                                                                                                                                                                                                                                                                                                                                                                                                                                                                                                                                                                                                                                                    |
| 13q14.12 - 13q14.13 | loss      | 10                        | COG3, FAM194B, GTF2F2, KCTD4, KIAA1704, NUFIP1, SIAH3, SLC25A30, SNORA31, SPERT, TPT1                                                                                                                                                                                                                                                                                                                                                                                                                                                                                                                                                                                                                                                                                                                                                                                                            |
| 13q14.13 - 13q14.2  | loss      | 10                        | ESD, HTR2A, LRCH1                                                                                                                                                                                                                                                                                                                                                                                                                                                                                                                                                                                                                                                                                                                                                                                                                                                                                |
| 13q14.2             | loss      | 10                        | ARL11, C13orf1, CAB39L, CDADC1, CYSLTR2, EBPL, FNDC3A, ITM2B, KCNRG, KPNA3, LPAR6, MED4, MIR3613, MLNR, NUDT15, PHF11, RB1, RCBTB1, RCBTB2, SETDB2, SUCLA2, TRIM13                                                                                                                                                                                                                                                                                                                                                                                                                                                                                                                                                                                                                                                                                                                               |
| 13q21.33 - 13q22.1  | loss      | 10                        | C13orf34, DIS3, MZT1                                                                                                                                                                                                                                                                                                                                                                                                                                                                                                                                                                                                                                                                                                                                                                                                                                                                             |
| 16q23.2 - 16q23.3   | loss      | 10                        | ATMIN, BCMO1, C16orf46, C16orf61, CDH13, CENPN, CMIP, GAN, GCSH, HSBP1, HSD17B2, MIR3182, MLYCD, MPHOSPH6, NECAB2, OSGIN1, PKD1L2, PLCG2, SDR42E1, SLC38A8                                                                                                                                                                                                                                                                                                                                                                                                                                                                                                                                                                                                                                                                                                                                       |
| 6q14.3              | loss      | 10                        | CGA, HTR1E, NT5E, SNORD50A, SNORD50B, SNX14, SYNCRIP, ZNF292                                                                                                                                                                                                                                                                                                                                                                                                                                                                                                                                                                                                                                                                                                                                                                                                                                     |

**Table S3.** Complete table of investigated tumors showing clinical and pathological information. Where two scores are shown in the Gleason score (GS) column, the first is the GS for the upper cut-section of the tumor and the latter is the GS for the bottom cut-section of the tumor. MS = Muenster Bio-bank, RD = Rotterdam Bio-bank, L = tumor focus obtained from left side of the prostate, R = tumor focus obtained from the right side of the prostate, NA = not available. Matching blood specimens were analyzed from MS50, MS151, MS368, MS840, MS971, MS34, MS334, MS38 and normal prostate tissue from RD819. Samples from the left side of some unifocal prostate cancer cases: \*MS34L, \*MS173L and \*MS334L had insufficient tumor quantity and were not analyzed. PSA, prostate-specific antigen.

| Sample ID        | Patient age<br>at time of<br>surgery<br>(years) | Total<br>Gleason<br>score | Gleason<br>score of<br>individual<br>focus | Pathological<br>stage | Clinical<br>stage | Prostate<br>volume<br>(cm <sup>3</sup> ) | Total<br>tumor<br>volume<br>(cm <sup>3</sup> ) | Tumor volume<br>of individual<br>focus (cm <sup>3</sup> ) | Focality   | Number of<br>tumor foci<br>in prostate | Pre-surgery<br>PSA level<br>(ng/mL) | PSA<br>recurrence |
|------------------|-------------------------------------------------|---------------------------|--------------------------------------------|-----------------------|-------------------|------------------------------------------|------------------------------------------------|-----------------------------------------------------------|------------|----------------------------------------|-------------------------------------|-------------------|
| MS50L<br>MS50R   | 66                                              | 4 + 3                     | 3 + 4<br>4 + 3                             | pT3a                  | cT2c              | 20                                       | 2.1                                            | 0.7<br>1.4                                                | multifocal | 2                                      | 19.6                                | NA                |
| MS151L<br>MS151R | 61                                              | 4 + 3                     | 4 + 3/3 + 3<br>4 + 3                       | pT3b                  | cT2c              | 19                                       | 2.85                                           | 0.76<br>2.09                                              | multifocal | 2                                      | 5.08                                | yes               |
| MS183L<br>MS183R | 59                                              | 4 + 3                     | 3 + 4<br>3 + 4                             | pT3a                  | cT2b              | 35                                       | 7.35                                           | 0.35<br>7.0                                               | multifocal | 2                                      | 14.4                                | yes               |
| MS210L<br>MS210R | 62                                              | 3 + 3                     | 3 + 3<br>3 + 3                             | pT3b                  | cT2c              | 32                                       | 8.64                                           | 4.16<br>4.48                                              | multifocal | 2                                      | 6.9                                 | no                |
| MS235L<br>MS235R | 65                                              | 4 + 5                     | 4 + 4/4 + 5<br>3 + 3/3 + 4                 | pT3a                  | cT2b              | 50                                       | 12.5                                           | 12.0<br>0.5                                               | multifocal | 2                                      | 3.68                                | yes               |
| MS343L<br>MS343R | 57                                              | 2 + 3                     | 3 + 3<br>3 + 4/3 + 3                       | pT2b                  | cT2b              | 19                                       | 1.33                                           | 0.95<br>0.19                                              | multifocal | 3                                      | 6.34                                | no                |
| MS368L<br>MS368R | 65                                              | 4 + 5                     | 3 + 4<br>4 + 5                             | pT3c                  | cT2b              | 32                                       | 13.76                                          | 2.56<br>11.2                                              | multifocal | 2                                      | 6.89                                | yes               |
| MS407L<br>MS407R | 51                                              | 3 + 4                     | 3 + 4/4 + 3<br>3 + 3/3 + 4                 | pT2b                  | cT2c              | 27                                       | 1.35                                           | 0.81<br>0.54                                              | multifocal | 2                                      | 10.46                               | no                |

Table S3. Cont.

| Sample ID         | Patient age<br>at time of<br>surgery<br>(years) | Total<br>Gleason<br>score | Gleason<br>score of<br>individual<br>focus | Pathological<br>stage | Clinical<br>stage | Prostate<br>volume<br>(cm <sup>3</sup> ) | Total<br>tumor<br>volume<br>(cm <sup>3</sup> ) | Tumor volume<br>of individual<br>focus (cm <sup>3</sup> ) | Focality   | Number of<br>tumor foci<br>in prostate | Pre-surgery<br>PSA level<br>(ng/mL) | PSA<br>recurrence |
|-------------------|-------------------------------------------------|---------------------------|--------------------------------------------|-----------------------|-------------------|------------------------------------------|------------------------------------------------|-----------------------------------------------------------|------------|----------------------------------------|-------------------------------------|-------------------|
| MS586L<br>MS586R  | 53                                              | 3 + 2                     | 3 + 3<br>3 + 3                             | pT2c                  | cT1c              | 35                                       | 4.55                                           | 0.7<br>1.4                                                | multifocal | 5                                      | 10.63                               | no                |
| MS840L<br>MS840R  | 66                                              | 4 + 3                     | 3 + 4<br>3 + 4                             | pT3a                  | cT2c              | 24                                       | 2.64                                           | 1.44<br>0.48                                              | multifocal | 4                                      | 30.13                               | no                |
| MS898L<br>MS898R  | 54                                              | 4 + 3                     | 3 + 4/3 + 3<br>3 + 4                       | pT2c                  | cT1c              | 35                                       | 3.5                                            | 0.35<br>2.8                                               | multifocal | 3                                      | 6.48                                | no                |
| MS946L<br>MS946R  | 61                                              | 3 + 2                     | 3 + 3<br>3 + 3                             | pT3a                  | cT2b              | 45                                       | 6.75                                           | 6.3<br>0.45                                               | multifocal | 2                                      | 9.73                                | no                |
| MS971L<br>MS971R  | 50                                              | 4 + 5                     | 3 + 4<br>3 + 4                             | pT3a                  | cT2a              | 18                                       | 1.26                                           | 1.08<br>0.18                                              | multifocal | 2                                      | 14.78                               | no                |
| RD819L<br>RD819R  | 52                                              | NA                        | 3 + 3<br>3 + 3                             | pT3a                  | cT1c              | NA                                       | NA                                             | NA<br>NA                                                  | multifocal | 2                                      | 6.5                                 | no                |
| *MS34L<br>MS34R   | 71                                              | 4 + 3                     | NA<br>4 + 3                                | pT2a                  | cT1c              | 38                                       |                                                | 4.56                                                      | unifocal   | 1                                      | 19.9                                | yes               |
| MS38L<br>MS38R    | 62                                              | 3 + 4                     | 3 + 3<br>3 + 3                             | pT3c                  | cT2c              | 33                                       |                                                | 22.4                                                      | unifocal   | 1                                      | 45.2                                | NA                |
| MS78L<br>MS78R    | 66                                              | 3 + 3                     | 3 + 3<br>3 + 3                             | pT3a                  | cT2b              | 44                                       |                                                | 3.08                                                      | unifocal   | 1                                      | 4.9                                 | yes               |
| MS99L<br>MS99R    | 57                                              | 3 + 4                     | 3 + 3<br>3 + 3                             | pT3a                  | cT2c              | 34                                       |                                                | 4.42                                                      | unifocal   | 1                                      | 4.1                                 | yes               |
| *MS173L<br>MS173R | 59                                              | 3 + 3                     | NA<br>3 + 3                                | pT3b                  | cT2b              | 24                                       |                                                | 1.2                                                       | unifocal   | 1                                      | 6.37                                | yes               |

Table S3. Cont.

| Sample ID          | Patient age<br>at time of<br>Surgery<br>(years) | Total<br>Gleason<br>score | Gleason<br>score of<br>individual<br>focus | Pathological<br>stage | Clinical<br>stage | Prostate<br>volume<br>(cm <sup>3</sup> ) | Total tumor volume (cm <sup>3</sup> ) | Focality | Number of<br>tumor foci<br>in prostate | Pre-Surgery<br>PSA level<br>(ng/mL) | PSA<br>recurrence |
|--------------------|-------------------------------------------------|---------------------------|--------------------------------------------|-----------------------|-------------------|------------------------------------------|---------------------------------------|----------|----------------------------------------|-------------------------------------|-------------------|
| *MS334L<br>MS334R  | 67                                              | 4 + 4                     | NA<br>3 + 3                                | pT3c                  | cT2c              | 28                                       | 15.96                                 | unifocal | 1                                      | 25.88                               | yes               |
| MS470L<br>MS470R   | 64                                              | 3 + 4                     | 3 + 3<br>3 + 3                             | pT3a                  | cT2b              | 49                                       | 11.27                                 | unifocal | 1                                      | 17.11                               | no                |
| MS1096L<br>MS1096R | 63                                              | 5 + 4                     | 3 + 4/4 + 4<br>3 + 3                       | pT4                   | NA                | 75                                       | 45.75                                 | unifocal | 1                                      | 6.0                                 | NA                |

© 2013 by the authors; licensee MDPI, Basel, Switzerland. This article is an open access article distributed under the terms and conditions of the Creative Commons Attribution license (<http://creativecommons.org/licenses/by/3.0/>).
